# Supplementary material
Source: publisher site journal article supplement (https://www.dovepress.com/article/333465)
Supplement: Supplementary file 1 [file get_supplementary_file.php]

**Supplementary Figure 1.**

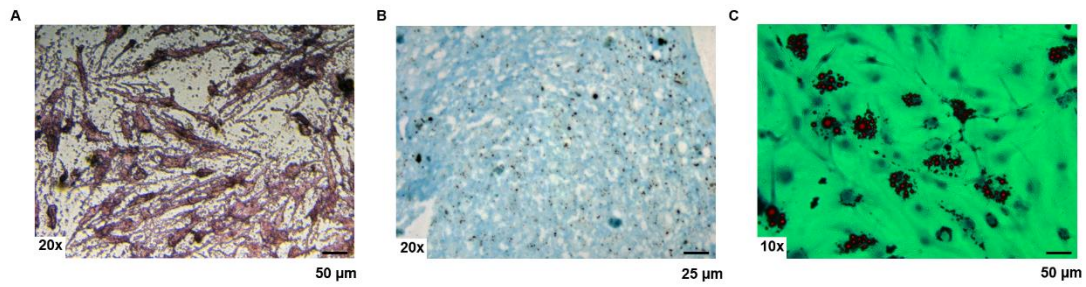

**Supplementary Figure 1. Identification of SMSCs by cell differentiation.**

(A) Alizarin red staining in SMSCs cultured in osteogenic differentiation medium for 21 d. (B) Alcian blue staining in SMSCs cultured in chondrogenesis differentiation medium for 21 d. (C) Oil Red O staining in SMSCs cultured in adipogenesis differentiation medium for 14 d.

**Supplementary Figure 2**

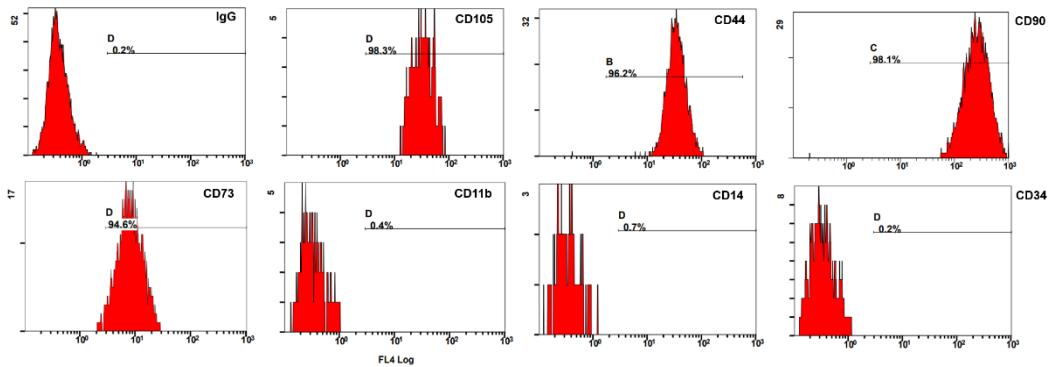

**Supplementary Figure 2. SMSCs surface-specific markers detection.**

FCM analysis showed that more than 94% of the SMSCs were able to express CD105, CD44, CD90 and CD73, but the number of cells expressing CD11b, CD14, and CD34 was less than 2%.

**Supplementary Figure 3**

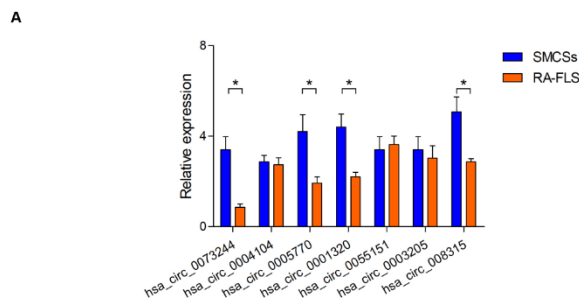

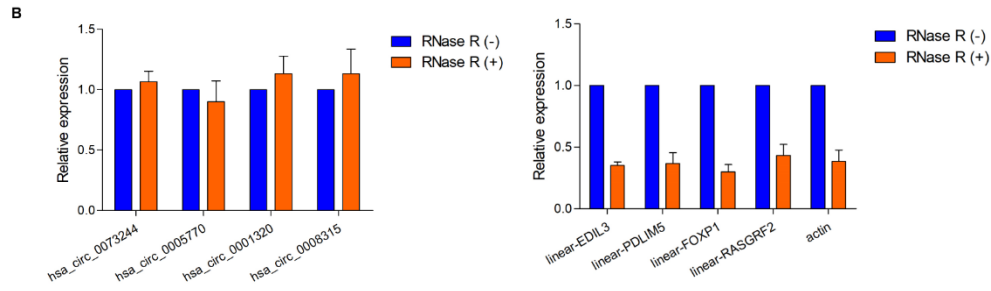

**Supplementary Figure 3. Confirmation of significantly upregulated circRNAs expressed in SMSCs relative to RA-FLS.**

(A) According to the previous article, we first selected 7 possible circular RNAs according to the relative transcriptional level of the top differentially highly expressed circRNAs, which were confirmed by qRT-PCR analysis of RNAs extracted from independent biological replicates of MSCs and skin fibroblasts. We found that 4 circRNAs (hsa\_circ\_0073244, hsa\_circ\_0005770, hsa\_circ\_0001320 and hsa\_circ\_0008315) had significantly higher expressions in SMSCs relative to RA-FLS via qRT-PCR analysis. (B) All the 4 circRNAs, hsa\_circ\_0073244, hsa\_circ\_0005770, hsa\_circ\_0001320 and hsa\_circ\_0008315 could resist RNase R's digestion, while their linear forms were digested by RNase R. Data are expressed as the mean  $\pm$  S.E.M. n = 3, each group; \* $p$  < 0.05.

**Supplementary Figure 4**

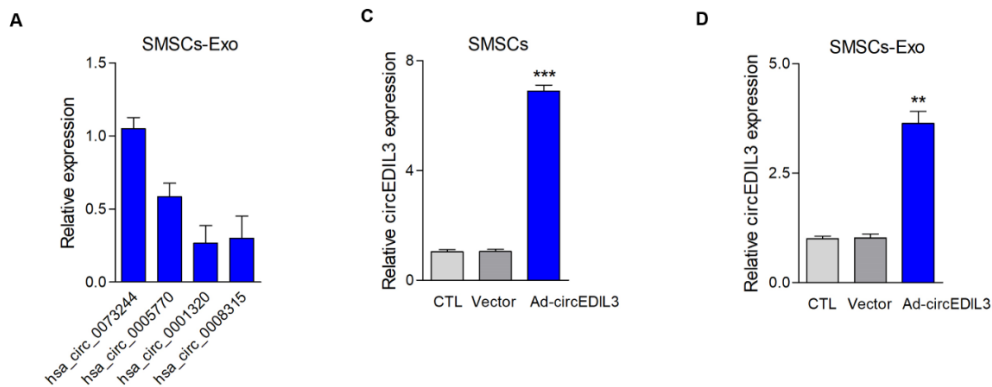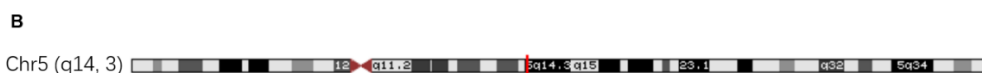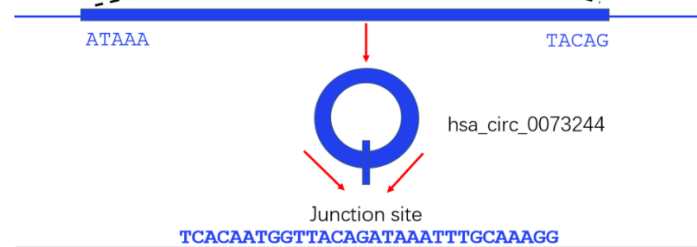

hsa\_circ\_0073244  
 ATAAATTTGCAAAGGAAATGAGAGTTACTGGTGTGATTACCCAAGGAGCCAAAG  
 AGGATTGGAAGCCAGAGTATATAAAATCCTACAAAATGCCTACAGTAATGAT  
 GGAAGACTTGGGCAATGTACAAAGTAAAGGCACCAATGAAGACATGGTGT  
 CGTGGAACATTTGATAACAACACTCCATATGCTAACTCTTTTACACCCCCATA  
 AAAGCTCAGTATGTAAGACTCTATCCCCAAGTTTGTGCGAAGACATTGCACTTTG  
 CGAATGGAACCTTCTGGCTGTGAACTGTCGGGTTGTTCTGAGCCCTGGGTATG  
 AAATCAGGACATATACAAGACTATCAGATCACTGCCTCCAGCATCTTCAGAACG  
 CTCACATGGACATGTTCACTTGGGAACCAAGGAAAGCTCGGCTGGACAAGCAA  
 GGCAAAGTGAAATGCCTGGACCTCTGGCCACAATGACCAGTCACAATGGTTACAG

**Supplementary Figure 4. Hsa\_circ\_0073244 (circEDIL3) expression in SMSCs-derived exosomes.**

(A) CircEDIL3 was confirmed to be the most highly expressed one among four circRNAs in SMSCs-Exo. (B) The genomic location of the mEDIL3 gene and of hsa\_circ\_0073244 plus the sanger sequencing showing the “head-to-tail” splicing of hsa\_circ\_0073244. (C) CircEDIL3 was confirmed to be successfully overexpressed in adenovirus vector encoding circEDIL3 (Ad-circEDIL3) infected SMSCs via qRT-PCR analysis. (D) Exosomes from the culture supernatants of Ad-circEDIL3-transfected SMSCs (Ad-circEDIL3-SMSCs-Exo) carried significantly enhanced expression of circEDIL3. Data are expressed as the mean  $\pm$  S.E.M. n = 3, each group; \*\* $p < 0.01$ , \*\*\* $p < 0.001$ .

**Supplementary Figure 5**

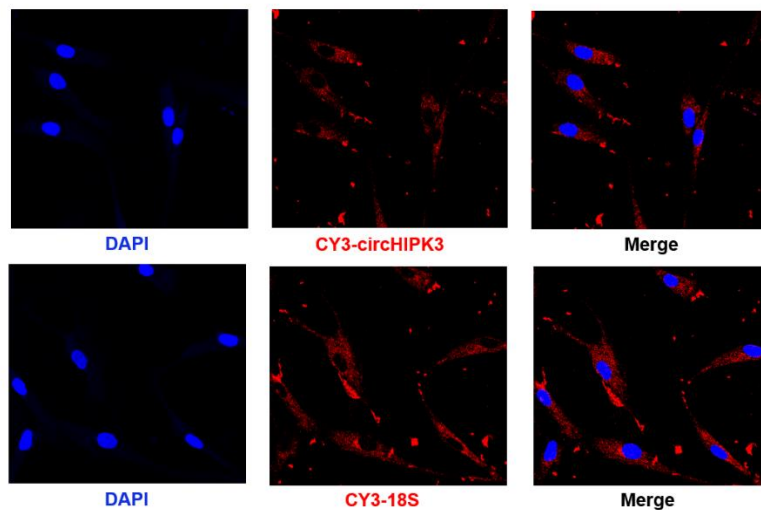

**Supplementary Figure 5. Location of circEDIL3 in cytoplasm.**

Fluorescence in situ hybridization (FISH) results showed that circEDIL3 transcript signals were mostly located in the cytoplasm of RA-FLS.

**Supplementary Figure 6**

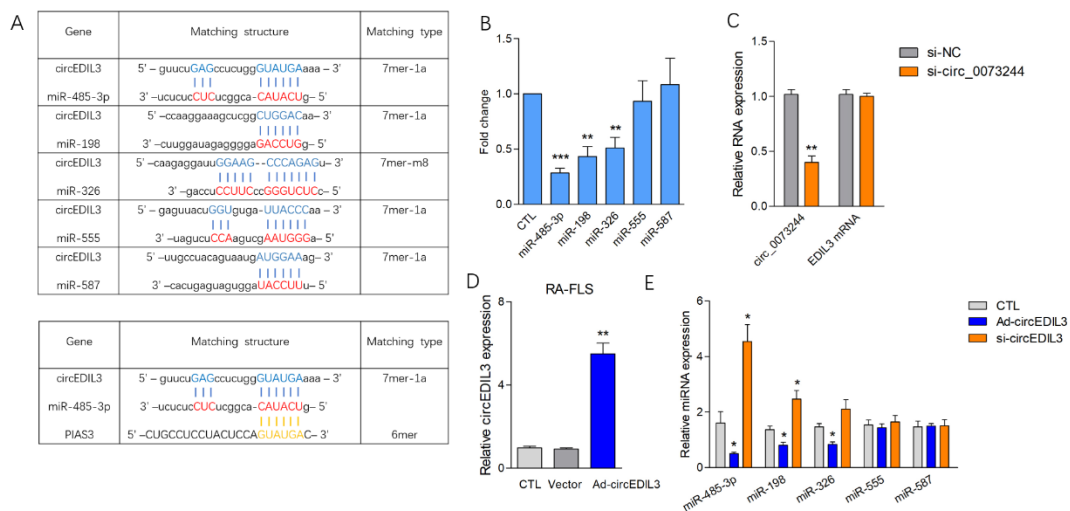

### Supplementary Figure 6. Screening target miRNAs of circEDIL3.

(A) At least one miRNA-binding site defined by Arraystar Proprietary Algorithms was confirmed using the CircInteractome database. The schematic graph illustrated binding sites between circEDIL3 and miR-485-3p, miR-485-3p and PIAS3 mRNA predicted by bioinformatics methods. (B) MiR-485-3p, miR-198 and miR-326 were able to reduce the Renilla luciferase reporter activity compared to the negative control. (C) The siRNA-mediated circ\_0073244 knockdown was quite significant in RA-FLS but its linear transcript EDIL3 expression was not obviously affected by si-circ\_0073244. Hence, the siRNA-mediated knockdown of circ\_0073244 was highly specific. (D) CircEDIL3 overexpression was successfully conducted in RA-FLS. (E) qRT-PCR analysis showed that upregulating circEDIL3 decreased miRNAs expression, while downregulating circEDIL3 increased miRNAs expression, and miR-485-3p was the most significant one. Data are expressed as the mean  $\pm$  S.E.M.  $n = 3$ , each group; \* $p < 0.05$ , \*\* $p < 0.01$ , \*\*\* $p < 0.001$ .

### Supplementary Figure 7

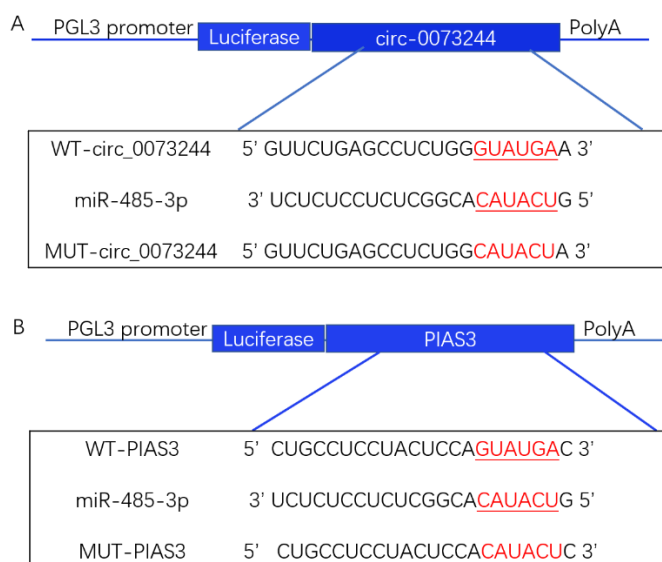

### Supplementary Figure 7. Mutant circEDIL3/PIAS3 sequences for luciferase reporter assay.

(A) Plasmids with wildtype or mutant circEDIL3 sequences were constructed to explore the correlation between circEDIL3 and predicted miR-485-3p. (B) Plasmids with wildtype or mutant PIAS3 sequences were constructed.

### Supplementary Figure 8

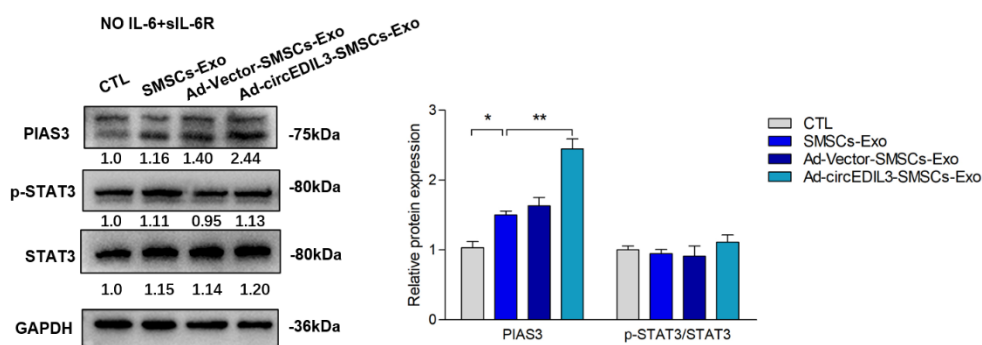

**Supplementary Figure 8. PIAS3 protein expression and STAT3 activity influenced by SMSCs-Exo or Ad-circEDIL3-Exo without IL-6+sIL-6R induction.**

Western blot analysis showed that without IL-6+sIL-6R induction, PIAS3 protein expression could be promoted by SMSCs-Exo treatment compared with PBS, and further upregulated by Ad-circEDIL3-Exo. However p-STAT3 and STAT3 protein levels as well as p-STAT3/STAT3 ratio didn't change significantly. Data are expressed as the mean  $\pm$  S.E.M. n = 3, each group; \* $p < 0.05$ , \*\* $p < 0.01$ .

**Supplementary Figure 9**

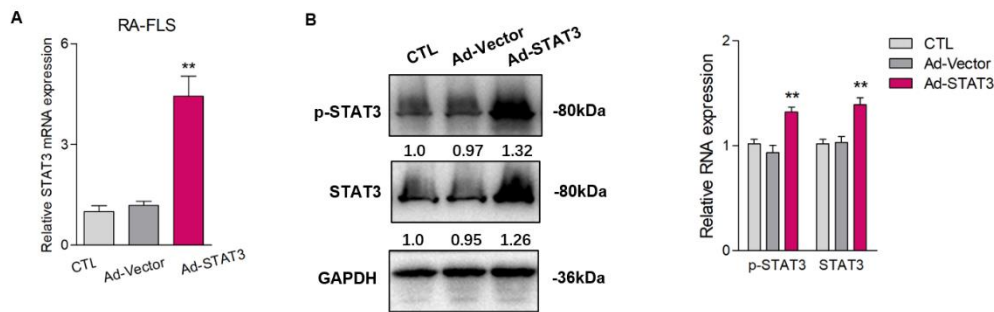

**Supplementary Figure 9. Successful overexpression of STAT3 in RA-FLS.**

Moderate STAT3 was transfected into RA-FLS to augment the intracellular STAT3 thus p-STAT3 expression. STAT3 mRNA (A) and protein (B) expression were significantly upregulated by STAT3 overexpression. Data are expressed as the mean  $\pm$  S.E.M. n = 3, each group; \*\* $p < 0.01$ .

**Supplementary Figure 10**

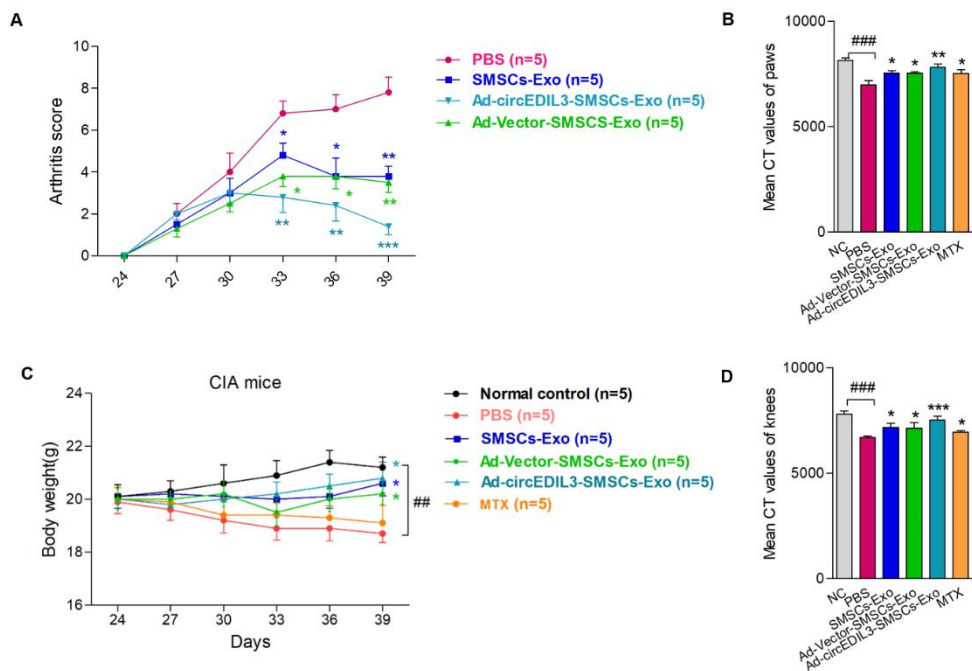

**Supplementary Figure 10. Clinical arthritis scores in CIA mice treated with Ad-Vector-SMSCS-Exo, and mean body-weight of CIA mice under different treatment.**

(A) Clinical arthritis scores of Ad-Vector-SMSCS-Exo group were shown. There was no significant difference of clinical arthritis scores between CIA mice treated with BMSCs-Exo and Ad-Vector-SMSCS-Exo. (B) Mean micro-CT values of paws were evaluated. Mean values were significantly decreased in CIA control mice compared to normal mice. Furthermore mean values of SMSCS-Exo, Ad-circEDIL3-SMSCS-Exo, MTX group were significantly increased compared with PBS treatment group, and interestingly, the increasement of mean values was more evident in Ad-circEDIL3-SMSCS-Exo group. micro-CT analysis also confirmed that bone erosions were similar when mice were injected with SMSCS-Exo or Ad-circEDIL3-SMSCS-Exo. (C) Mean body-weight of CIA mice under different treatment. (D) The changing trends of mean micro-CT values of knee joints were consistent with paws. Data are expressed as the mean  $\pm$  S.E.M. \* $p < 0.05$ , \*\* $p < 0.01$ , \*\*\* $p < 0.001$  versus PBS treatment group, ## $p < 0.01$ , ### $p < 0.001$  versus NC. NC = normal control.

**Supplementary Table 1 (Table S 1). Primers and probes used in the study.**

| Gene                  | Sequence                                                            |
|-----------------------|---------------------------------------------------------------------|
| hsa_circ_0073244      | 5' -AATGACCAGTCACAATGGTTACAGA- 3'<br>3' -TCTTGGCTCCTTGGGTAATCAC- 5' |
| miR-485-3p            | 5' -CAGTCATACACGGCTCTCCTC- 3'<br>3' -CCAGTGCAGGGTCCGAGGT- 5'        |
| STAT3                 | 5'-CCAGTCAGTGACCAGGCAGAAAG-3'<br>3'-GCACGTACTCCATCGCTGACA-5'        |
| PIAS3                 | 5'-GCCGACATGGACGTGTCCTGTG-3'<br>3'-TTCCCTCCTGGACTGCGCTGTAC-5'       |
| VEGF                  | 5' -TTCTGGGCTGTTCTCGCTTC- 3'<br>3' -CTCTCCTCTTCTTCTCTTCTCC- 5'      |
| GAPDH                 | 5' - GCACCGTCAAGGCTGAGAAC- 3'<br>3' -TGGTGAAGACGCCAGTGGA- 5'        |
| U6                    | 5'-GTAGATACTGCAGTACG-3'<br>3'-ATCGCATGACGTACCTGAGC-5'               |
| <b>circRIP probes</b> |                                                                     |
| hsa_circ_0073244      | 5'-CTCATTTCCTTTGCAAATTTATCTCTAACCA<br>TTGTGACTGGTC-3'-biotin        |
| Control               | 5'-CTAAGACTAGGAGTTCGGCGGAACCACAAA<br>AAGAGACCTCAGAA-3'-biotin       |

---

**FISH probes**

---

|                  |                                       |
|------------------|---------------------------------------|
| hsa_circ_0073244 | 5'-CY3-TTTATCTGTAACCATTTGTGACTGGTC-3' |
|------------------|---------------------------------------|

---

**siRNAs**

---

|                 |                               |
|-----------------|-------------------------------|
| si-circ_0073244 | 5' -UAUCUGUAACCAUUGUGACUG- 3' |
|-----------------|-------------------------------|

---

|       |                            |
|-------|----------------------------|
| si-NC | 5'- UUCUCCGAACGUGUCACGU-3' |
|-------|----------------------------|

---

|                  |         |
|------------------|---------|
| miR-485-3p mimic | RiboBio |
|------------------|---------|

---

|                      |         |
|----------------------|---------|
| miR-485-3p inhibitor | RiboBio |
|----------------------|---------|

---
